# Supplementary material for: Antidepressants inhibit P2X4 receptor function: a possible involvement in neuropathic pain relief
Source: PubMed Central journal article supplement (PMC2680826; doi:10.1186/1744-8069-5-20), 2009-04-23

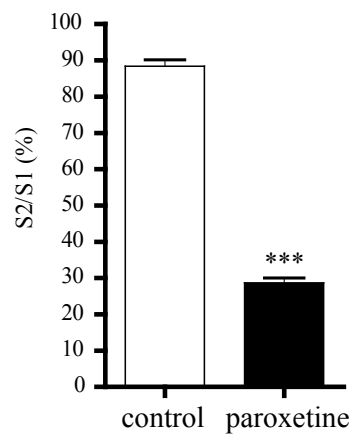

Supplement: 1744-8069-5-20-S2.pdf [file 1744-8069-5-20-S2.pdf]
